# Supplementary material
Source: Springer Nature journal article supplement (https://www.springermedizin.de/resource/supplementary/12913_2006_252_MOESM2_ESM.pdf/9534692)
Supplement: MOESM2 [file 9534692]

Du har nettopp ordinert antibiotika til denne pasienten.  
Er dette en "vent-og-se" resept?

**Nei - dette er en vanlig resept**

**Ja - dette er en vent-og-se resept**

**Dersom resepten  
brukes, skal den  
innløses innen**

**dager**

Trykk <enter> for å lagre
